# Supplementary material for: A highly stable and efficient benzothiadiazole-based fluorescence sensor for salicylaldehyde in aqueous solution
Source: Royal Society of Chemistry journal article supplement (doi:10.1039/d3ce00130j), 2023-01-01
Supplement: d3ce00130j1.pdf [file d3ce00130j1.pdf]

## ***Electronic Supplementary Information (ESI)***

### **A highly stable and efficient benzothiadiazole-based fluorescence sensor for salicylaldehyde in aqueous solution**

Xiao-Long Yan,<sup>a</sup> Xiao-Qin Cao,<sup>a</sup> Cheng-Rui Deng,<sup>a</sup> Teng-Fei Zheng,<sup>a\*</sup>  
Shu-Li Yao<sup>b\*</sup> and Sui-Jun Liu<sup>a\*</sup>

<sup>a</sup>School of Chemistry and Chemical Engineering, Jiangxi Provincial Key Laboratory of Functional Molecular Materials Chemistry, Jiangxi University of Science and Technology, Ganzhou 341000, Jiangxi Province, P.R. China

<sup>b</sup>School of Rare Earth and New Materials Engineering, Ganzhou Key Laboratory of Advanced Processing and Technology Optimization of High Performance Tungsten Base Materials, Gannan University of Science and Technology, Ganzhou 341000, Jiangxi Province, P.R. China

E-mail: sjliu@jxust.edu.cn (S.-J. Liu), slyao\_gnust@163.com (S.-L. Yao), zhengtengfei0628@163.com. Tel: +86-797-8312204.

**Table S1.** Selected bond lengths (Å) and angles (°) for **JXUST-27**.

|                                       |            |                                        |            |
|---------------------------------------|------------|----------------------------------------|------------|
| Cd1—N1                                | 2.243(2)   | Cd1—N6 <sup>i</sup>                    | 2.2792(19) |
| Cd1—O4 <sup>ii</sup>                  | 2.3043(18) | Cd1—O1                                 | 2.351(2)   |
| Cd1—O2                                | 2.3851(18) | Cd1—O3 <sup>ii</sup>                   | 2.4169(18) |
| N1—Cd1—O4 <sup>ii</sup>               | 135.85(7)  | O1—Cd1—O2                              | 55.29(6)   |
| N1—Cd1—O1                             | 104.89(7)  | N6 <sup>i</sup> —Cd1—O3 <sup>ii</sup>  | 85.83(7)   |
| O4 <sup>ii</sup> —Cd1—O1              | 115.01(7)  | O1—Cd1—O3 <sup>ii</sup>                | 165.17(7)  |
| N6 <sup>i</sup> —Cd1—O2               | 140.82(7)  | O4 <sup>ii</sup> —Cd1—O2               | 98.92(7)   |
| N6 <sup>i</sup> —Cd1—O4 <sup>ii</sup> | 104.44(7)  | N1—Cd1—O3 <sup>ii</sup>                | 88.36(7)   |
| N6 <sup>i</sup> —Cd1—O1               | 86.18(7)   | O4 <sup>ii</sup> —Cd1—O3 <sup>ii</sup> | 55.39(6)   |
| N1—Cd1—N6 <sup>i</sup>                | 96.01(7)   | O2—Cd1—O3 <sup>ii</sup>                | 133.29(7)  |
| N1—Cd1—O2                             | 88.33(7)   |                                        |            |

Symmetry codes: (i)  $x, -y+1/2, z-1/2$ ; (ii)  $-x+1, y-1/2, -z+1/2$ .**Table S2.** SHAPE analysis of the Cd<sup>II</sup> ion in **JXUST-27**.

| ion        | label  | shape                         | symme    | distortio    |
|------------|--------|-------------------------------|----------|--------------|
|            | HP-6   | Hexagon                       | $D_{6h}$ | 29.133       |
|            | PPY-6  | Pentagonal pyramid            | $C_{5v}$ | 11.898       |
| <b>Cd1</b> | OC-6   | Octahedron                    | $O_h$    | 11.585       |
|            | TPR-6  | Trigonal prism                | $D_{3h}$ | <b>8.412</b> |
|            | JPPY-6 | Johnson pentagonal pyramid J2 | $C_{5v}$ | 15.455       |

**Table S3.** HOMO and LUMO energies for BIBT and SA.

|      | LUMO     | HOMO     | Ref. |
|------|----------|----------|------|
| SA   | -1.78 eV | -6.65 eV | S1   |
| BIBT | -3.07 eV | -6.06 eV | S2   |

## References

- S1 K. Wang, T. F. Zheng, J. L. Chen, H. R. Wen, S. J. Liu and T. L. Hu. *Inorg. Chem.*, 2022, **61**, 16177-16184.
- S2 J. J. Wang, L. Q. Li, Z. H. Zhu, T. F. Zheng, H. Xu, Y. Peng, J. L. Chen, S. J. Liu and H. R. Wen, *New J. Chem.*, 2022, **46**, 20623-20628.

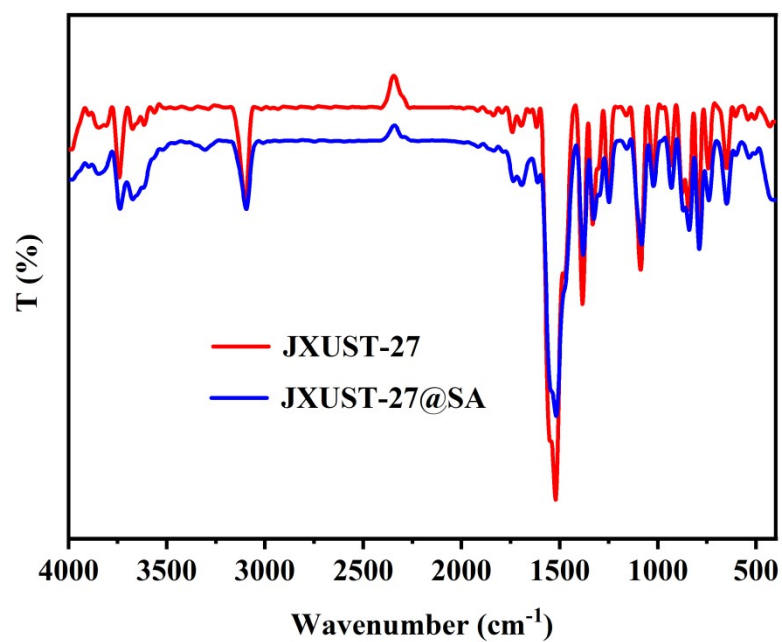

**Fig. S1** IR spectra of **JXUST-27** and **JXUST-27@SA** at room temperature.

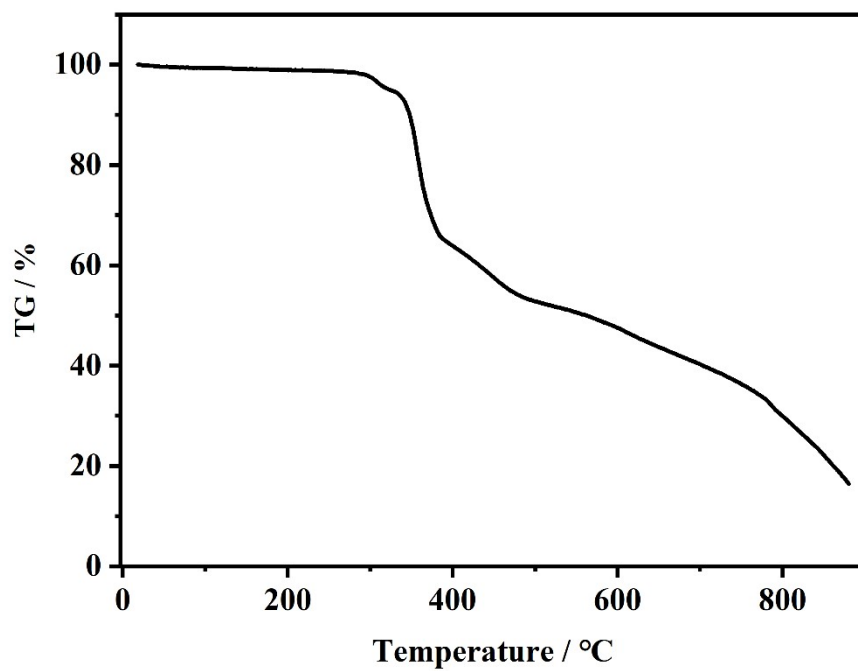

**Fig. S2** The TGA curve of JXUST-27 under N<sub>2</sub> atmosphere.

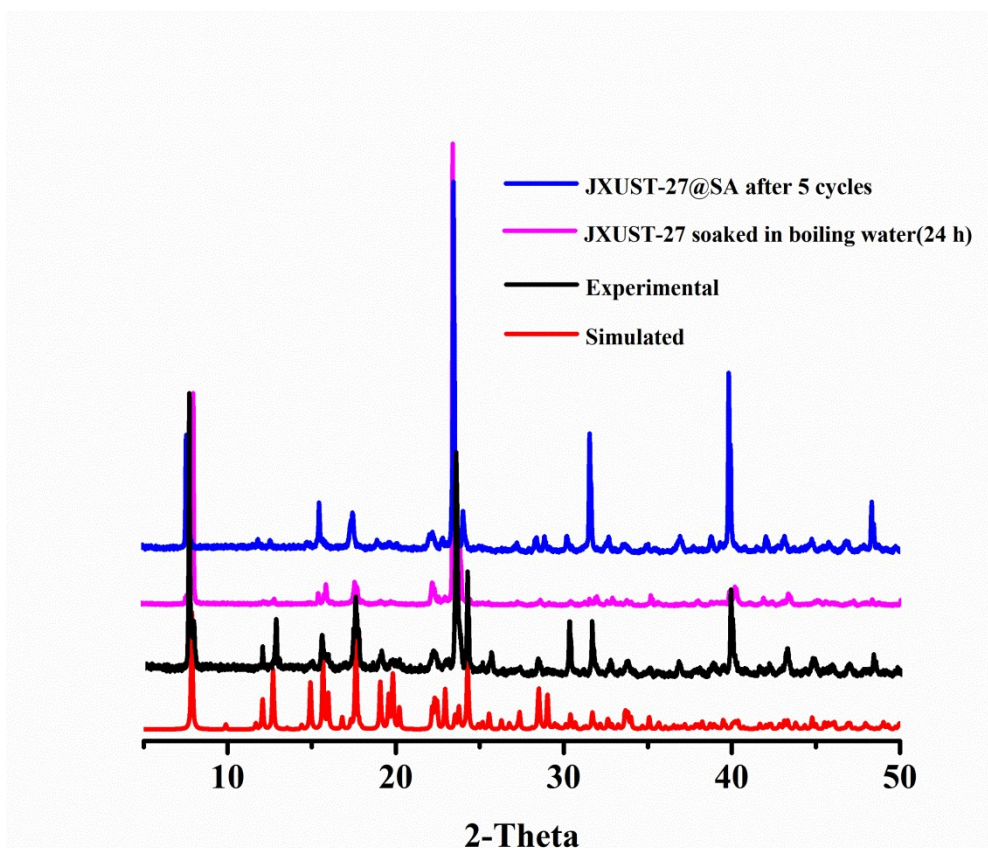

(a)

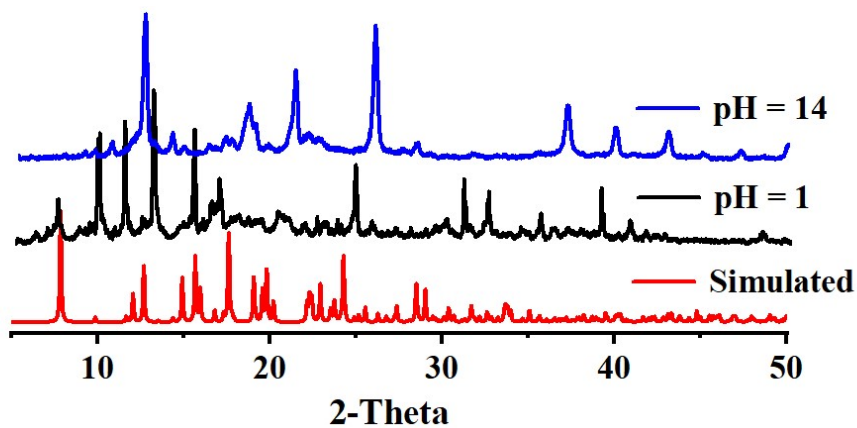

(b)

**Fig. S3** (a) The PXRD patterns of as-synthesized JXUST-27, JXUST-27@SA after 5 cycles and JXUST-27 after soaked in boiling water for 24 h and the simulated one; (b) the simulated and experimental PXRD patterns of JXUST-27 immersed in the distinct aqueous solutions with pH values of 1 and 14 for 12 hours.

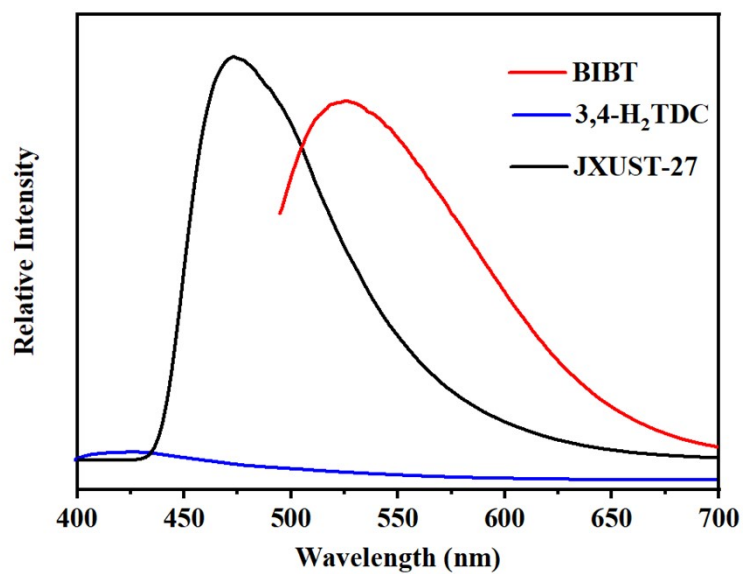

(a)

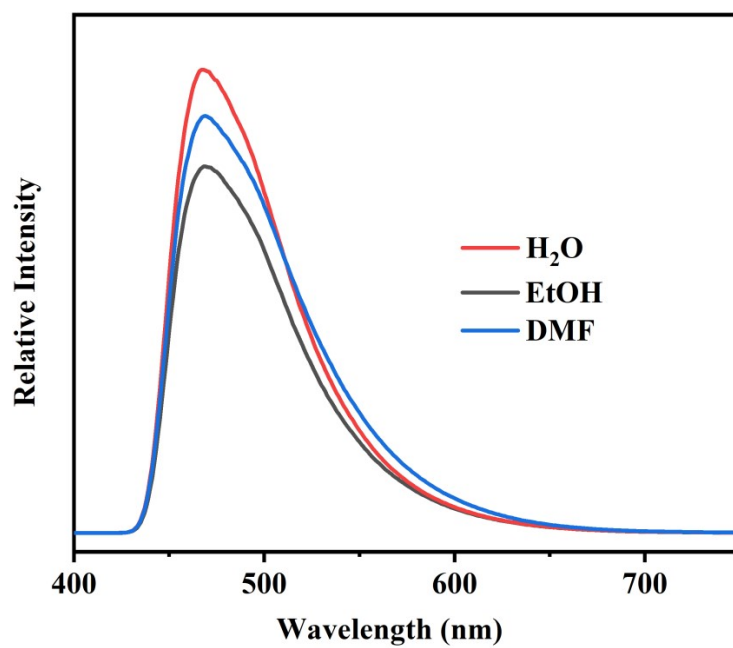

(b)

**Fig. S4** (a) The solid emission spectra of BIBT, 3,4-H<sub>2</sub>TDC and JXUST-27; (b) the emission spectra of JXUST-27 in aqueous, DMF and EtOH solutions.

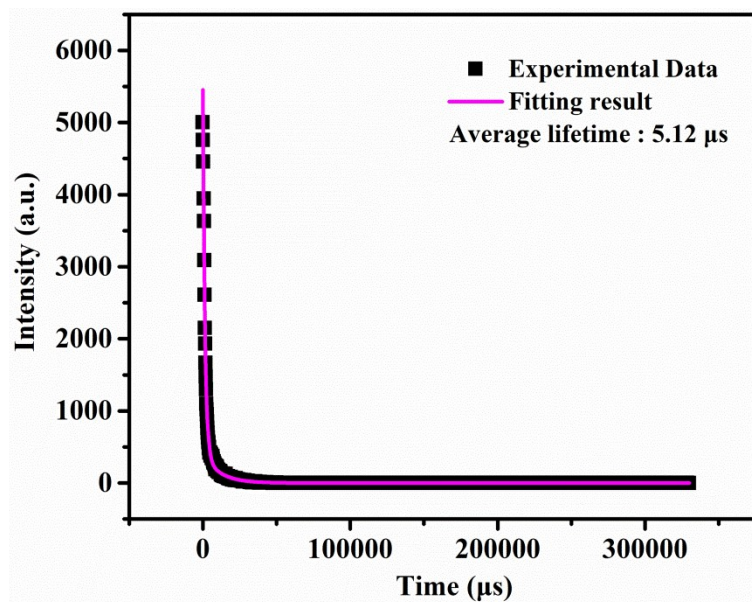

Fig. S5 The luminescence decay curve of JXUST-27.

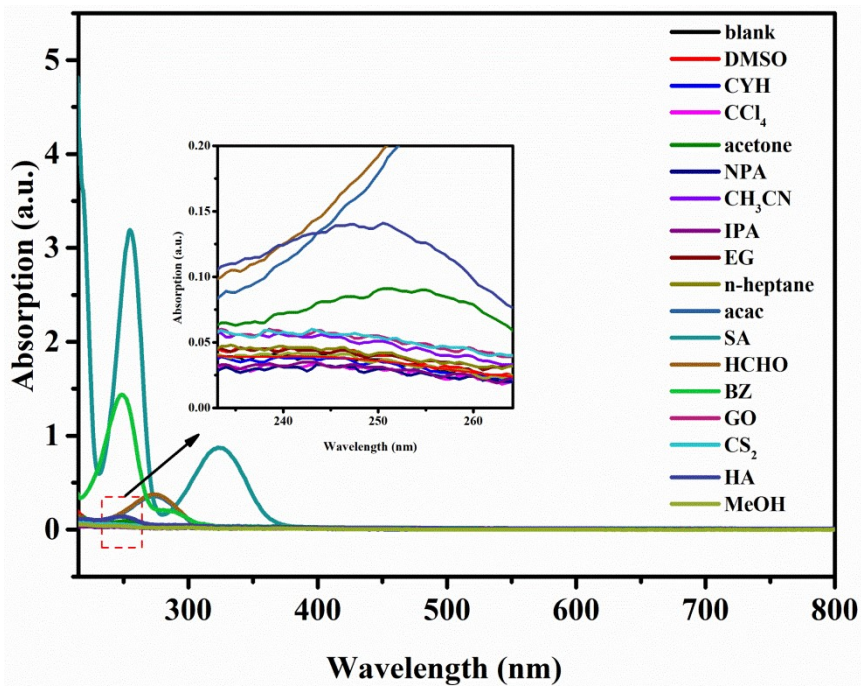

**Fig. S6** The UV-Vis absorption spectra of JXUST-27 and JXUST-27 upon the addition of different organic molecules.

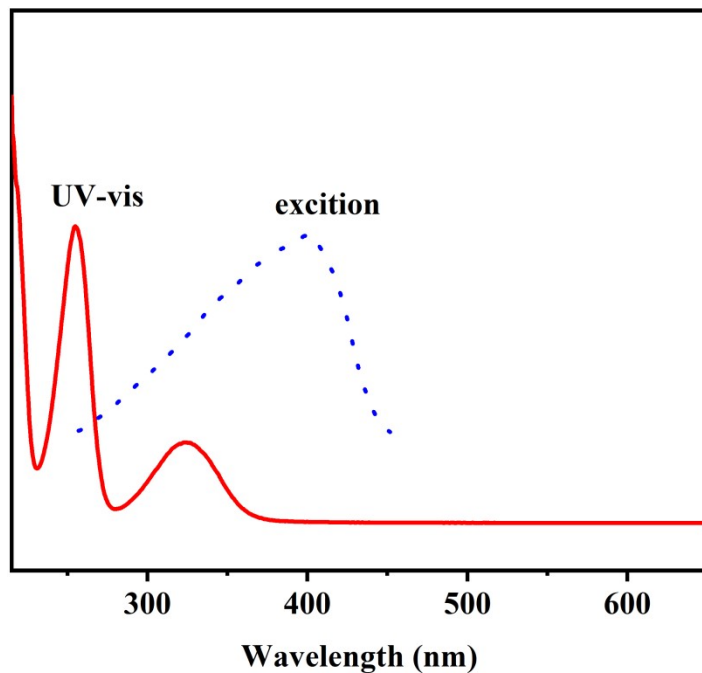

**Fig. S7** The UV-Vis absorption spectrum of JXUST-27@SA and excitation spectrum of JXUST-27.
